# Supplementary material for: Regulation of wee1+ expression during meiosis in fission yeast
Source: PubMed Central journal article supplement — Cell Cycle. 2014 Oct 30;13(18):2853–8. doi: 10.4161/15384101.2014.946807 (PMC4612672; doi:10.4161/15384101.2014.946807), 2014-10-30
Supplement: kccy-13-18-946807-s001.pdf [file kccy-13-18-946807-s001.pdf]

**Table S1. Yeast strains used in the study.**

---

| Strain | Genotype                                                                                                                                                                                                               |
|--------|------------------------------------------------------------------------------------------------------------------------------------------------------------------------------------------------------------------------|
| HM1307 | <i>h<sup>+</sup>/h<sup>+</sup> pat1-114/pat1-114 ade6-M210/ade6-M216</i>                                                                                                                                               |
| HM2163 | <i>h<sup>+</sup>/h<sup>+</sup> pat1-114/pat1-114 mei4::<i>ura4</i>/mei4::<i>ura4 ura4-D18/ura4-D18 leu1-32/leu1-32 ade6-M210/ade6-M216</i></i>                                                                         |
| HM4582 | <i>h<sup>+</sup>/h<sup>+</sup> pat1-114/pat1-114 mei4::<i>kan<sup>r</sup>-P3-nmt1-mei4<sup>+</sup></i>/mei4::<i>kan<sup>r</sup>-P3-nmt1-mei4<sup>+</sup> ade6-M210/ade6-M216</i></i>                                   |
| HM4732 | <i>h<sup>-</sup>/h<sup>-</sup> pat1-114/pat1-114 cdc25-GFP-kan/+ wee1-HA-kan/+ ade6-M210/ade6-M216</i>                                                                                                                 |
| HM4735 | <i>h<sup>+</sup>/h<sup>+</sup> pat1-114/pat1-114 mei4::<i>kan<sup>r</sup>-P3-nmt1-mei4<sup>+</sup></i>/mei4::<i>kan<sup>r</sup>-P3-nmt1-mei4<sup>+</sup> cdc25-GFP-kan/+ wee1-HA-kan/+<br/>ade6-M210/ade6-M216</i></i> |
| HM4833 | <i>h<sup>-</sup>/h<sup>-</sup> pat1-114/pat1-114 mei4::<i>ura4</i>/mei4::<i>ura4 cdc25-GFP-kan/+ wee1-HA-kan/+ ura4-D18/ura4-D18<br/>ade6-M210/ade6-M216</i></i>                                                       |
| HM5678 | <i>h<sup>-</sup>/h<sup>-</sup> pat1-114/pat1-114 wee1-DF1234/wee1-DF1234 ade6-M210/ade6-M216</i>                                                                                                                       |

**Table S2. Primers and double-stranded oligonucleotides used in the study.**

| Primer or probe number | Sequence (5' to 3')           |
|------------------------|-------------------------------|
| 477                    | CCGGAATTCTTCTACTCCTGCTCAGAAG  |
| 478                    | CCGGGATCCGGACGAGGTGAGAGCAGAAG |
| 740                    | AAATATTTGAGTAAACAAACAAAATCA   |
| 741                    | TGATTTTGTTTGTTTACTCAAATATTT   |
| 742                    | CCCTCTTTCTTTGTTTCCTTAT        |
| 743                    | ATAAGGAACAAAGAAAGAGGG         |
| 860                    | ATCTCTCATTTGTTTACTGGTTATTCC   |
| 861                    | GGAATAACCAGTAAACAAATGAGAGAT   |
| 862                    | TTCCTTTGATTATTTACTTTATATATA   |
| 863                    | TATATATAAAGTAAATAATCAAAGGAA   |
| 866                    | TTGAATGCTTAGAGGGCACTT         |
| 867                    | TTAAGGGTTGCATGGGATAA          |
| 868                    | CGGGATCTCTCATTTGTTTA          |
| 869                    | AAGGTCACACACTGGAGACT          |
| 870                    | ATGCTGAAAACCGAGTACAA          |
| 871                    | CGAGACAAAGGCAATAACTT          |
| 872                    | ACTAACGAGCAGGTCATTGT          |
| 873                    | GACCCGTATCTTCGTACATC          |
| 907                    | GCCAGATAAATGAGTTT             |
| 908                    | AAACTCATTTATCTGGC             |
| 909                    | TTTTCTATTTACCTTTT             |
| 910                    | AAAAGGTAAATAGAAAA             |
| 911                    | TTCCTGTTTCTGTTTACATTTTTTTTCA  |
| 912                    | TGAAAAAAATGTAAACAGAAACAGGAA   |
| 913                    | CATCGGAAAAGTAAGCTACT          |
| 914                    | AGGTAGTTTTGGGATCAGAG          |
| 915                    | TATTTTTCTCCTTCGGTTCT          |
| 916                    | GAATCAAACCATCCAAAGT           |
| 1040                   | CGAATGAACTGTTTCGATTG          |
| 1041                   | TGTTGCTTGTGTCAGGAAAGTG        |
